# Supplementary material
Source: PubMed Central journal article supplement (PMC3984615)
Supplement: NIHMS531436-supplement-216_2013_7391_MOESM1_ESM.pdf [file NIHMS531436-supplement-216_2013_7391_MOESM1_ESM.pdf]

Analytical and Bioanalytical Chemistry

Electronic Supplementary Material

**A sensitive and selective LC-differential mobility-mass spectrometric analysis of allopregnanolone and pregnanolone in human plasma**

Wen Jin, Michael Jarvis, Michal Star-Weinstock, Margaret Altemus

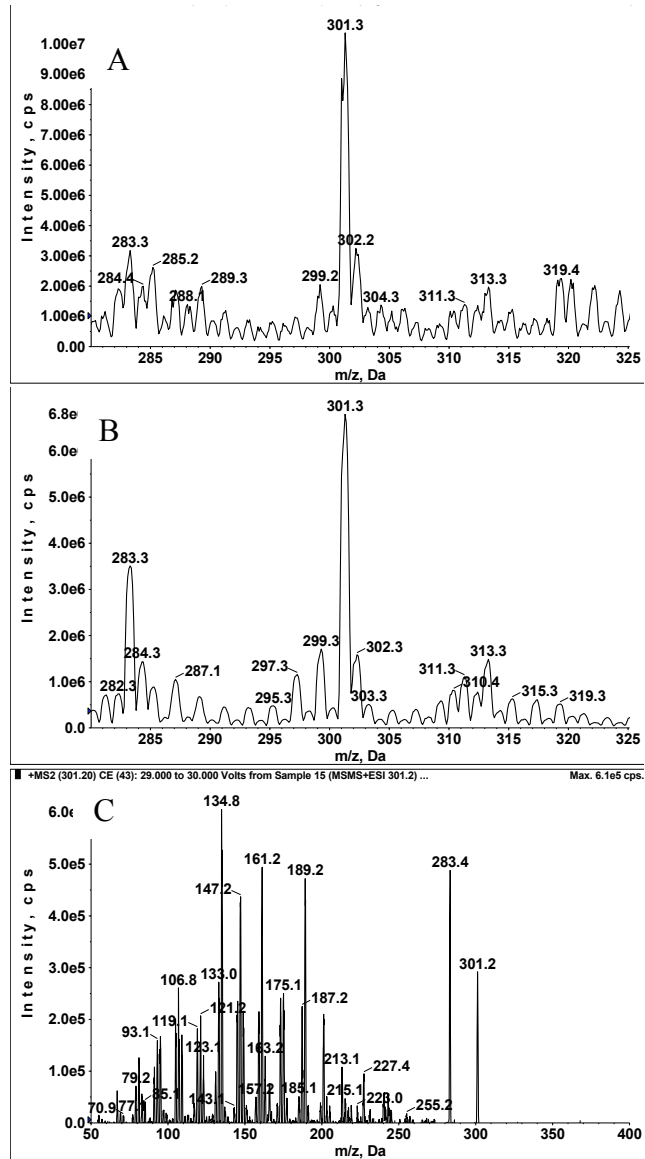

**Fig. S1.** Allopregnanolone Q1 scan in ESI (A) and APCI (B) mode and ESI product ion scan (C)

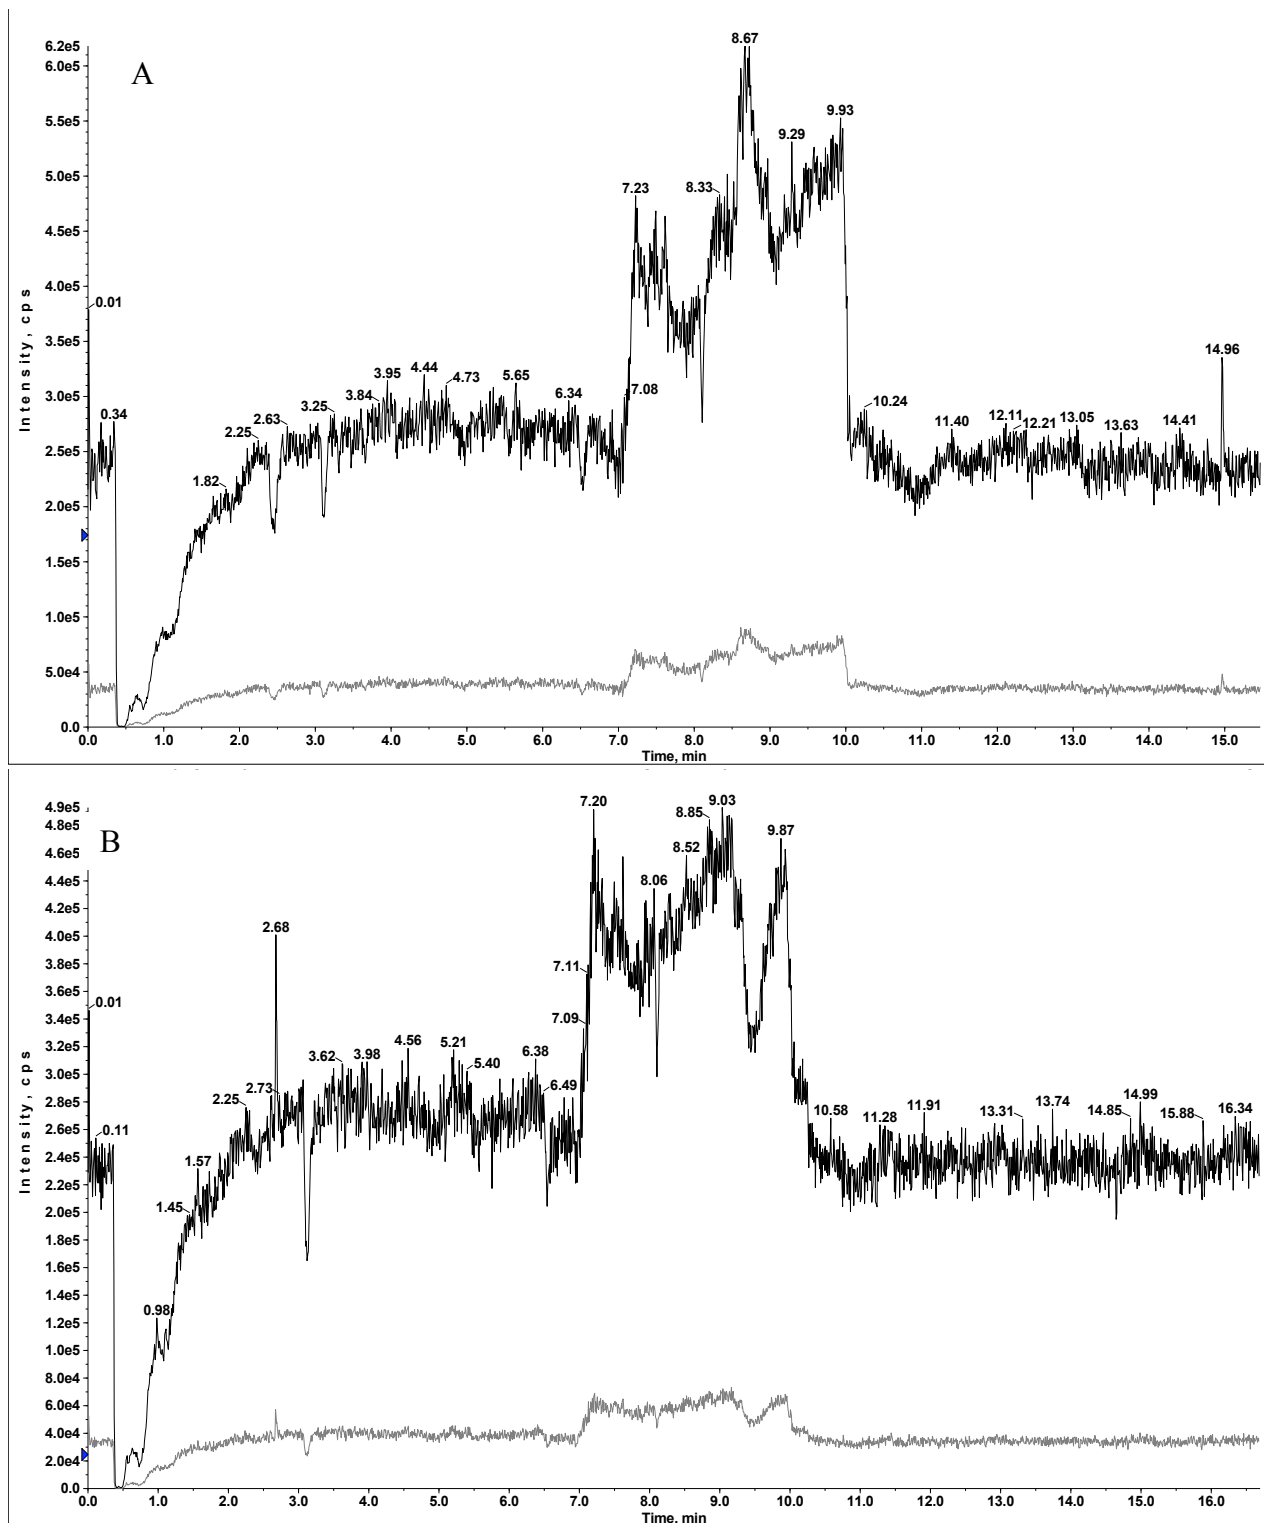

**Fig. S2** Ion-suppression test by T-infusion of allopregnanolone and pregnanolone for blank injection (A) and sample (P11) injection (B). MRM transition 433.3→374.4 in black trace and MRM transition 433.3→126.1 in grey trace
